# Supplementary material for: Noncanonical Wnt5a enhances Wnt/β-catenin signaling during osteoblastogenesis
Source: Springer Nature journal article supplement (doi:10.1038/srep04493), 2014-03-27
Supplement: 41598_2014_BFsrep04493_MOESM1_ESM.pdf [file 41598_2014_BFsrep04493_MOESM1_ESM.pdf]

Supplementary Information

**Noncanonical Wnt5a enhances Wnt/ $\beta$ -catenin signaling  
during osteoblastogenesis**

Masanori Okamoto<sup>1</sup>, Nobuyuki Udagawa<sup>2</sup>, Shunsuke Uehara<sup>2</sup>, Kazuhiro Maeda<sup>3</sup>, Teruhito Yamashita<sup>4</sup>, Yuko Nakamichi<sup>4</sup>, Hiroyuki Kato<sup>1</sup>, Naoto Saito<sup>5</sup>, Yasuhiro Minami<sup>6</sup>, Naoyuki Takahashi<sup>4</sup>, and \*Yasuhiro Kobayashi<sup>4</sup>

## Methods

### Luciferase assay

After adenovirus-mediated gene transfer of *Lrp5* or *LacZ* cDNA, calvarial cells were cultured under osteogenic conditions for 10 days. Cells were harvested with the trypsin-EDTA treatment, and Super TOPFlash reporter vectors<sup>1</sup> with 8 x Tcf/Lef binding sites (5 mg Addgene, Cambridge, MA) and the pRL-TK Luciferase control reporter vector (0.05 mg, Promega, Madison, WI) were transfected into these cells ( $1 \times 10^6$ ) using a Nucleofector kit and a device (Lonza, Basel, Switzerland) according to the manufacturers' instructions. Two days after transfection, these cells were stimulated with 50 ng/ml recombinant Wnt3a (R&D systems, Minneapolis, MN) for 24 hours. Reporter activity was measured using the Dual-Luciferase Reporter assay reagents (Promega).

## References

1. Veeman, M.T. *et. al.* Zebrafish prickles, a modulator of noncanonical Wnt/Fz signaling, regulates gastrulation movements. *Curr. Biol.* **13**, 680-685, (2003).

Supplementary Figure S1

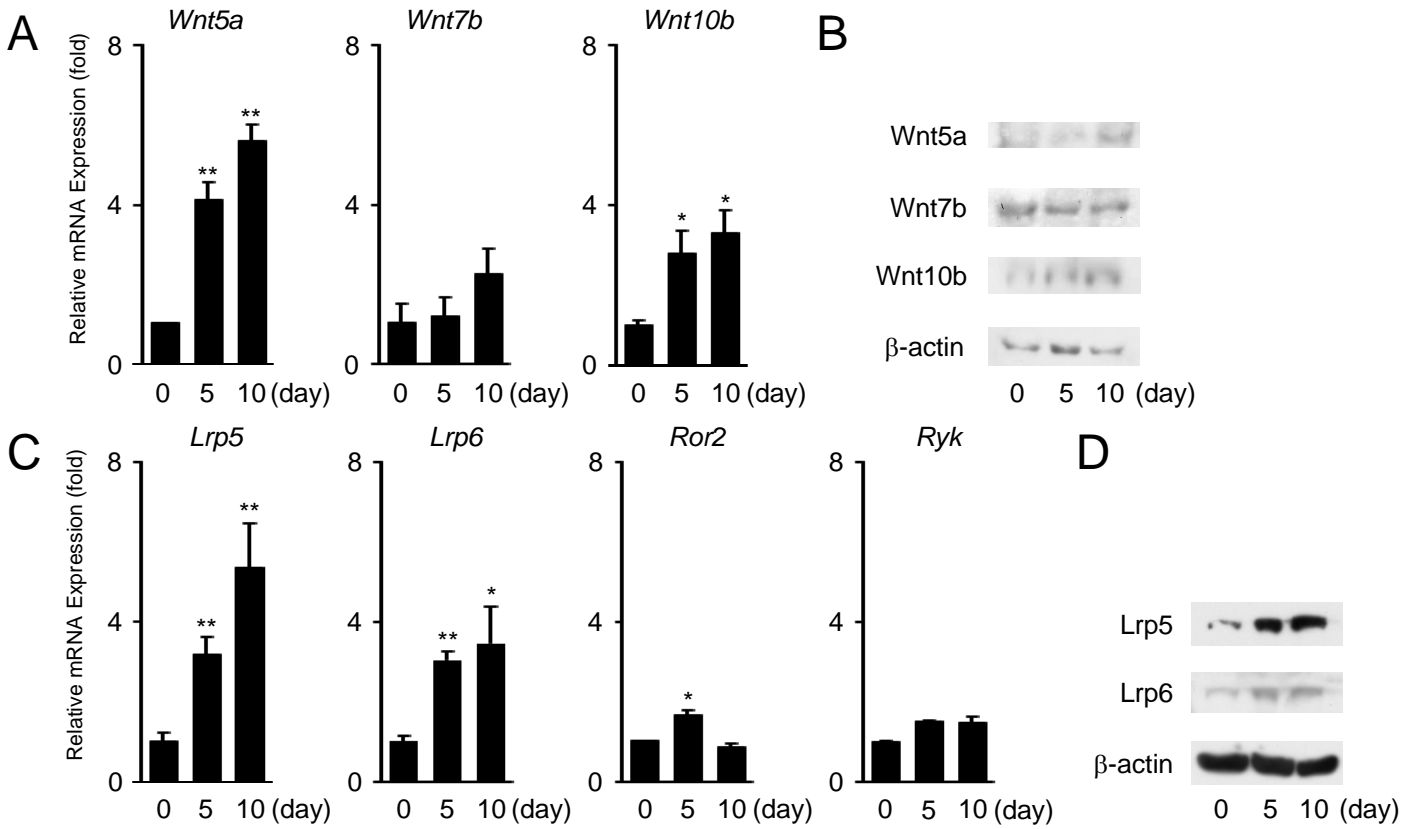

**Supplementary Figure S1. The expression of Wnt ligands (A, B) and co-receptors (C, D) in**

**calvarial cells in osteogenic medium.** Calvarial cells from wild-type mice were cultured in

osteogenic medium and subjected to real-time PCR analysis and Western blot analysis. In (B,D), 40

µg protein of cell lysates was used. In (A, C), data are expressed as the mean  $\pm$  SD ( $n = 3 - 4$  for

each group). \* $p < 0.05$ ; \*\* $p < 0.01$ . All  $p$  values based on the Student's  $t$  test.

Supplementary Figure S2

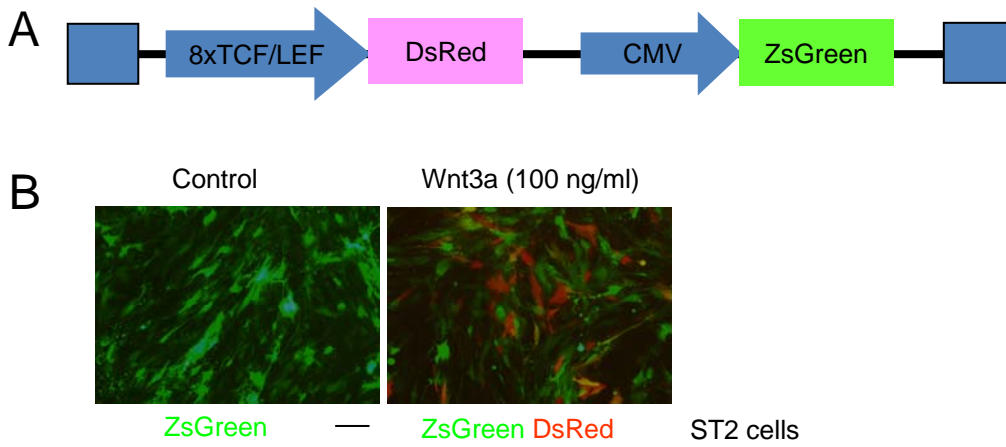

**Supplementary Figure S2.** A) Structure of the 8xTcf/Lef DsRed adenoviral reporter vectors.

B) Photographs of ST2 cells, in which the 8xTcf/Lef DsRed reporter was expressed.

ST2 cells were treated with Wnt3a (100 ng/ml) for 48 hours. Bar, 15  $\mu$ m.

Supplementary Figure S3

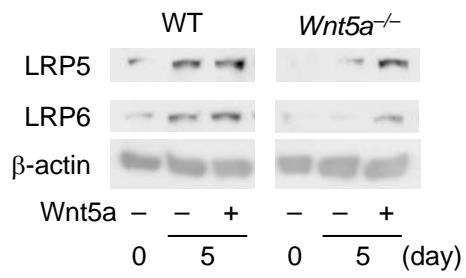

**Supplementary Figure S3. Western blot analysis of Lrp5/6 expression in wild-type (WT) and  $Wnt5a^{-/-}$  calvarial cells.** Cells were cultured in the presence or absence of Wnt5a (500 ng/ml) under osteogenic conditions for 5 days.

Supplementary Figure S4

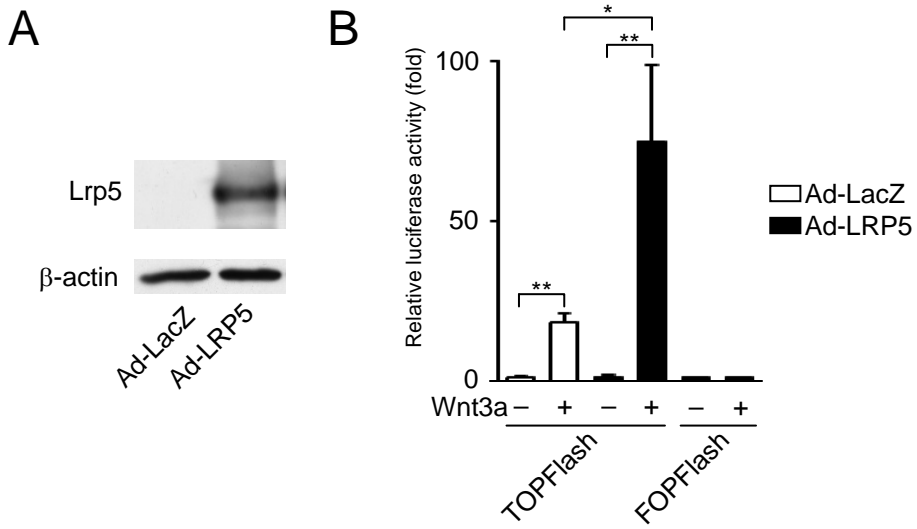

**Supplementary Figure S4.** Western blot analysis of Lrp5 expression (A) and Tcf/lef transcriptional activity (B) in calvarial cells infected with LacZ- and Lrp5-adenovirus. Data are expressed as the mean  $\pm$  SD ( $n = 6$ ). \* $p < 0.05$ ; \*\* $p < 0.01$ . All  $p$  values are based on the Student's  $t$  test.

**Fig. 1C**

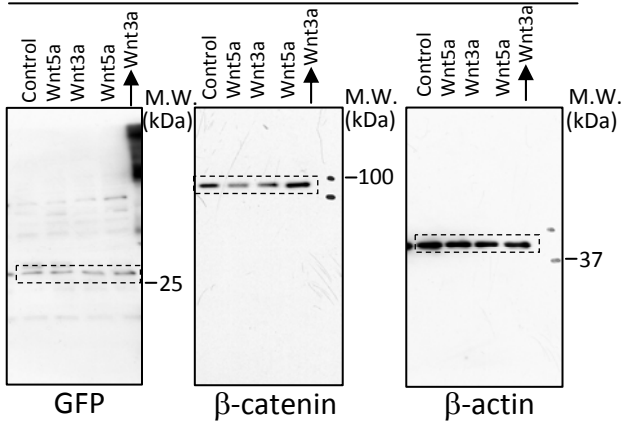

**Fig. 2B**

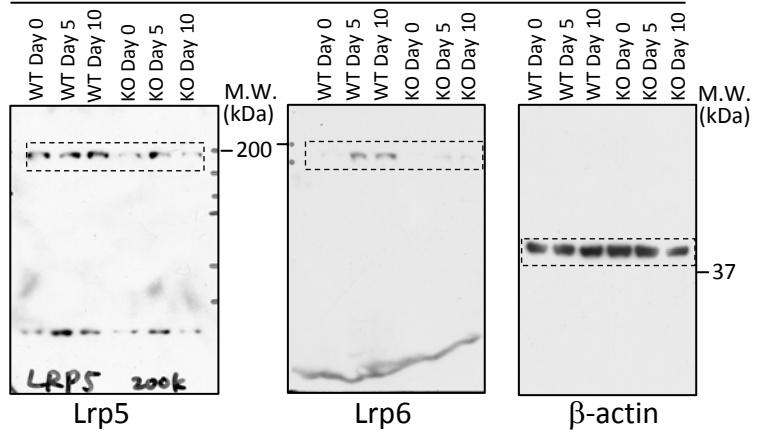

**Fig. 3D**

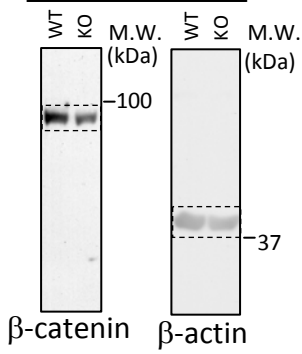

**Fig. 3F**

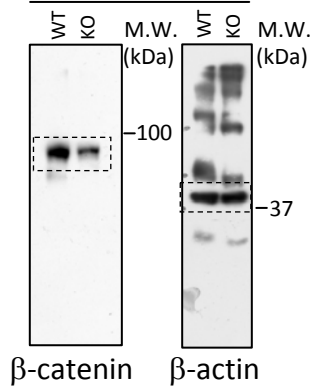

**Fig. 5A**

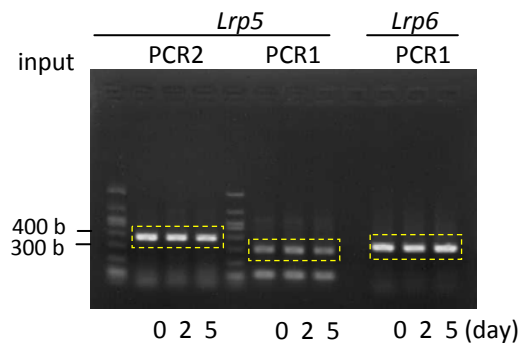

**Fig. 5B**

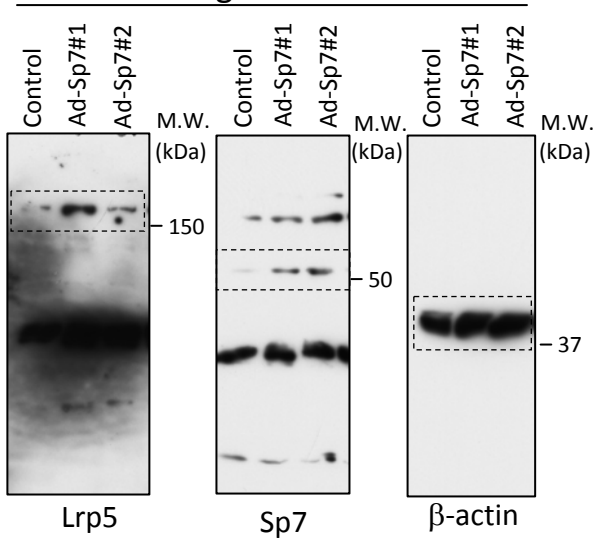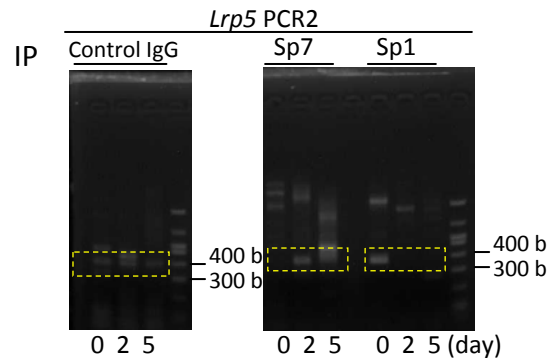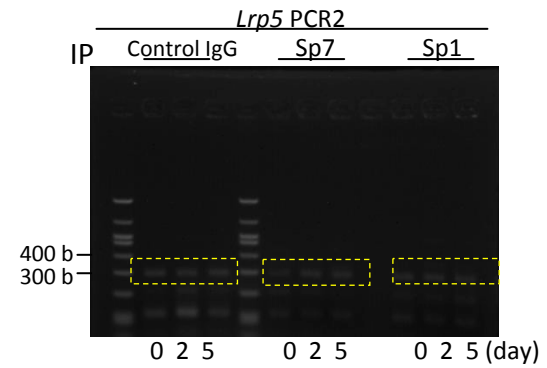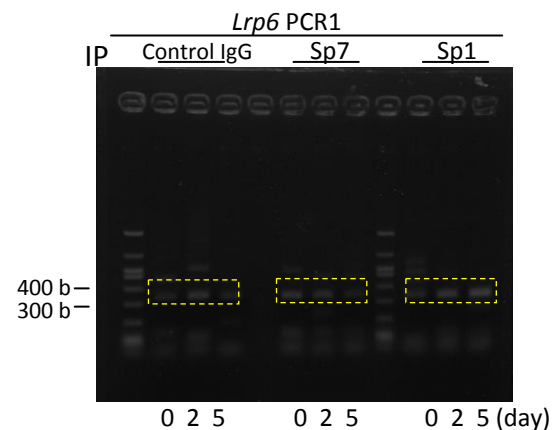

**Supplementary Figure S5. Uncropped images of Western blots and agarose gels. M.W.; molecular weight.**

Supplementary Table S1

Primers for real time PCR

|          |            | Forward                   | Reverse                |
|----------|------------|---------------------------|------------------------|
|          | GAPDH      | ACCACAGTCCATGCCATCAC      | TCCACCACCCTGTTGCTGTA   |
|          | Wnt1       | ATAGCCTCCTCCACGAACCT      | GGAATTGCCATTTGCACTCT   |
|          | Wnt2       | GGTCAGCTCTTCATGGTGGT      | ATCTCTGTCCAGGGTGTTC    |
|          | Wnt2b      | TCAACGCTACCCAGACATCA      | ACCACTCCTGCTGACGAGAT   |
|          | Wnt3       | AGGAGTGCCAGCATCAGTTC      | ACTTCCAGCCTTCTCCAGGT   |
|          | Wnt3a      | CTGGCAGCTGTGAAGTGAAG      | TGGGTGAGGCCTCGTAGTAG   |
|          | Wnt4       | CTGGAGAAGTGTGGCTGTGA      | CAGCCTCGTTGTTGTGAAGA   |
|          | Wnt5a      | CAAATAGGCAGCCGAGAGAC      | CTCTAGCGTCCACGAACTCC   |
|          | Wnt5b      | CTGCTTGCGTAATGAGACCA      | AAAGCAACACCAGTGGAACC   |
|          | Wnt6       | TCAGTTCAGTTCGGTTTCC       | CATGGAACAGGCTTGAGTGA   |
|          | Wnt7a      | GGTGCAGCATCATCTGTAA       | TCCTTCCCGAAGACAGTACG   |
|          | Wnt7b      | TTCTGGAGGACCGCATGAA       | GGTCCAGCAAGTTTTGGTGGTA |
|          | Wnt8a      | AGCACAGAGGCTGAGCTGA       | TCTGCTCTCCTCTCCTCCAC   |
|          | Wnt8b      | CTGCTTGGAATTGCCTCTC       | CTGCTTGGAATTGCCTCTC    |
|          | Wnt9a      | TGCTTTCCTCTACGCCATCT      | CCTTGACAAACTTGCTGCTG   |
|          | Wnt9b      | TGGAGCGCTGTACTTGTGAC      | GCACTTGCAAGTTGTTCTCA   |
|          | Wnt10a     | CATGAGTGCCAGCATCAGTT      | ACCGCAAGCCTTCAGTTTAC   |
|          | Wnt10b     | CGAGAATGCGGATCCACAA       | CCGGTTCAGGTTTTCCGTTA   |
|          | Wnt11      | CAGGATCCCAAGCCAATAAA      | GTAGCGGGTCTTGAGGTCAG   |
|          | Wnt16      | GAGCTGTGCAAGAGGAAACC      | TGAATGCTGTCTCCTTGGTG   |
|          | Frizzled1  | CCCAACTCCCTCCTTGCTAC      | CAAACCTTGTCGTTGCACACC  |
|          | Frizzled2  | ATCTTTCTGTCCGGCTGCTA      | GATGGCTAGGCTCTTGCACT   |
|          | Frizzled3  | TTCCATGTCCGTACCAGGTT      | ATGCTGCCGTGAGGTAGTCT   |
|          | Frizzled4  | GATATCCCGCACATTCTCGT      | TGGCACATAAACCGAACAAA   |
|          | Frizzled5  | CACTCAAGACTCCGGAGAGG      | GGTAGCGGCTTGTGGTAGTC   |
|          | Frizzled6  | GTGCTGCAAGAGTCCTGTGA      | CGCTGCTCTTTGGACTTACC   |
|          | Frizzled7  | AAGACTTGCAAGACGATGCT      | TGTATCTCCCACTCGCCTTC   |
|          | Frizzled8  | ACTACAACCGCACCGACCT       | ACAGGCGGAGAGGAATATGA   |
|          | Frizzled9  | CGATGAACTGACTGGGCTCT      | CACCACCAAGGACATGAAGA   |
|          | Frizzled10 | CAGTCCTGGCAACACGTATG      | TTTATGCACAGGCAGCAAAG   |
|          | LRP5       | AATCAACAAGCCACCCTCTG      | GGCTCCACCAACATACTCGT   |
|          | LRP6       | ACCCTGCAGCACTGATGTCT      | GTTCTCCTCCGCTGACAAGT   |
|          | Ror2       | CCCAACTTCTACCCAGTCCA      | TGTCCGCCACAGATGTATTG   |
|          | Ryk        | GGCATGCAAAGTCCAAGG        | CATGCCCATAGCCACAAAGT   |
| MA024599 | Alpl       | ACACCTTGACTGTGGTTACTGCTGA | CCTTGTAGCCAGGCCCGTTA   |
| MA081113 | Col1a1     | CCTGGCAAAGACGGACTCAAC     | GCTGAAGTCATAACCGCCACTG |
| MA053008 | Bglap1     | AGCAGCTTGGCCCAGACCTA      | TAGCGCCGAGTCTGTTCACTAC |
| MA073758 | Runx2      | GACGTGCCAGGCGTATTTC       | AAGGTGGCTGGGTAGTGCATTC |
| MA079534 | Sp7        | CGCATCTGAAAGCCCCTTG       | CAGCTCGTCAGAGCGAGTGAA  |
| MA114855 | Axin2      | ATGTCCTGTCTGCCAGCGTTC     | CAAGCACTAGCCAGTGGGTCAA |
